# Supplementary material for: Neuroprotective Effects of Human-Induced Pluripotent Stem Cell-Derived Mesenchymal Stem Cell Extracellular Vesicles in Ischemic Stroke Models
Source: MDPI journal article supplement (doi:10.3390/biomedicines11092550), 2023-09-17
Supplement: s1 [file s1]

**Supplementary Table S1.** Comparison of Cell viability (%) within OGD treatment. Student t test results shown.

| Group               | Mean   | S.D. | N | P value     | Comparison variables                    |
|---------------------|--------|------|---|-------------|-----------------------------------------|
| Control-24hr        | 99.89  | 4.26 | 6 | NA          | NA                                      |
| OGD-2hr-FBS-24hr    | 84.89  | 2.3  | 6 | 1.87137E-05 | OGD-2hr-FBS-24hr VS Control-24hr        |
| OGD-2hr-No FBS-24hr | 78.88  | 3.43 | 6 | 0.005106764 | OGD-2hr-No FBS-24hr VS OGD-2hr-FBS      |
| Control-48hr        | 99.84  | 5.76 | 6 | NA          | NA                                      |
| OGD-2hr-FBS-48hr    | 77.92  | 3.75 | 6 | 1.44575E-05 | OGD-2hr-FBS-48hr VS Control-48hr        |
| OGD-2hr-No FBS-48hr | 47.45  | 2.06 | 6 | 8.18525E-09 | OGD-2hr-No FBS-48hr VS OGD-2hr-FBS-48hr |
| Control-72hr        | 100.14 | 4.92 | 6 | NA          | NA                                      |
| OGD-2hr-FBS-72hr    | 88.94  | 2.05 | 6 | 0.01488723  | OGD-2hr-FBS-72hr VS Control-72hr        |
| OGD-2hr-No FBS-72hr | 44.70  | 3.55 | 6 | 4.80457E-05 | OGD-2hr-No FBS-72hr VS OGD-2hr-FBS-72hr |

**Supplementary Table S2.** Comparison of Cell viability (%) within OGD and EVs treatment.

Student t test results shown.

| Group                          | Mean   | S.D.  | N | P value     | Comparison variables                                       |
|--------------------------------|--------|-------|---|-------------|------------------------------------------------------------|
| Control-24hr                   | 100.08 | 3.65  | 6 | NA          | NA                                                         |
| OGD-2hr-Normal medium-24hr     | 75.52  | 6.34  | 6 | 0.00012093  | OGD-2hr-Normal medium-24hr VS Control-24hr                 |
| OGD-2hr-without FBS-24hr       | 63.74  | 4.55  | 6 | 0.008567348 | OGD-2hr-without FBS-24hr VS OGD-2hr-Normal medium-24hr     |
| OGD-2hr-with 100 µg/ml EV-24hr | 77.83  | 10.19 | 6 | 0.022423269 | OGD-2hr-with 100 µg/ml EV-24hr VS OGD-2hr-without FBS-24hr |

|                                       |        |      |   |             |                                                                     |
|---------------------------------------|--------|------|---|-------------|---------------------------------------------------------------------|
| Control-48hr                          | 100.05 | 4.95 | 6 | NA          | NA                                                                  |
| OGD-2hr-<br>Normal<br>medium-48hr     | 75.99  | 5.01 | 6 | 2.24651E-05 | OGD-2hr-Normal<br>medium-48hr VS<br>Control-48hr                    |
| OGD-2hr-<br>without FBS-<br>48hr      | 37.28  | 1.81 | 6 | 2.07635E-07 | OGD-2hr-without<br>FBS-48hr VS OGD-<br>2hr-Normal medium-<br>48hr   |
| OGD-2hr-with<br>100 µg/ml EV-<br>48hr | 46.11  | 0.95 | 6 | 5.09341E-05 | OGD-2hr-with 100<br>µg/ml EV-48hr VS<br>OGD-2hr-without<br>FBS-48hr |
| Control-48hr                          | 100    | 7.1  | 6 | NA          | NA                                                                  |
| OGD-2hr-<br>Normal<br>medium-48hr     | 88.88  | 6.15 | 6 | 0.015834995 | OGD-2hr-Normal<br>medium-72hr VS<br>Control-72hr                    |
| OGD-2hr-<br>without FBS-<br>48hr      | 38.93  | 3.07 | 6 | 5.08876E-08 | OGD-2hr-without<br>FBS-72hr VS OGD-<br>2hr-Normal medium-<br>72hr   |
| OGD-2hr-with<br>100 µg/ml EV-<br>48hr | 68.72  | 6.09 | 6 | 1.01304E-05 | OGD-2hr-with 100<br>µg/ml EV-72hr VS<br>OGD-2hr-without<br>FBS-72hr |

**Supplementary Table S3.** Comparison of Live cell (%) within OGD and EVs treatment. Student t test results shown.

| Group                        | Mean | S.D. | N | P value | Comparison<br>variables                                 |
|------------------------------|------|------|---|---------|---------------------------------------------------------|
| Control                      | 95   | 6    | 3 | NA      | NA                                                      |
| OGD-2hr-<br>Normal medium    | 93   | 5    | 3 | 0.6814  | OGD-2hr-Normal<br>medium VS Control                     |
| OGD-2hr-<br>without FBS      | 72   | 4    | 3 | 0.0052  | OGD-2hr-without<br>FBS VS OGD-2hr-<br>Normal medium     |
| OGD-2hr-with<br>100 µg/ml EV | 92   | 6    | 3 | 0.0085  | OGD-2hr-with 100<br>µg/ml EV VS OGD-<br>2hr-without FBS |

**Supplementary Table S4.** Comparison of Zea Longa score within MCAO and MCAO+EV treatment.

Student t test results shown.

| Group    | Mean | S.D. | N | P value | Comparison variables |
|----------|------|------|---|---------|----------------------|
| Sham+PBS | 0    | 0    | 4 | NA      | NA                   |
| Sham+EV  | 0    | 0    | 4 | NA      | NA                   |
| MCAO+PBS | 3    | 0.82 | 4 | 0.0052  | MCAO+PBS VS Sham+EV  |
| MCAO+EV  | 3.25 | 0.5  | 4 | 0.6376  | MCAO+EV VS MCAO+PBS  |

**Supplementary Table S5.** Comparison of mNSS score within MCAO and MCAO+EV treatment.

Two-way ANVOA test results shown.

| Group        | Mean | S.D. | N | Source of Variation (% of total variation)                                                       |
|--------------|------|------|---|--------------------------------------------------------------------------------------------------|
| Sham+PBS-D0  | 0    | 0    | 4 | Interaction 2.417<br>P=0.0295<br>Row Factor 86.76<br>P<0.0001<br>Column Factor 4.862<br>P<0.0001 |
| Sham+EV-D0   | 0    | 0    | 4 |                                                                                                  |
| MCAO+PBS-D0  | 0    | 0    | 4 |                                                                                                  |
| MCAO+EV-D0   | 0    | 0    | 4 |                                                                                                  |
| Sham+PBS-D3  | 0    | 0    | 4 |                                                                                                  |
| Sham+EV-D3   | 0    | 0    | 4 |                                                                                                  |
| MCAO+PBS-D3  | 7.5  | 0.58 | 4 |                                                                                                  |
| MCAO+EV-D3   | 6    | 0.82 | 4 |                                                                                                  |
| Sham+PBS-D14 | 0    | 0    | 4 |                                                                                                  |
| Sham+EV-D14  | 0    | 0    | 4 |                                                                                                  |
| MCAO+PBS-D14 | 6.5  | 1.30 | 4 |                                                                                                  |
| MCAO+EV-D14  | 5.3  | 0.58 | 4 |                                                                                                  |
| Sham+PBS-D28 | 0    | 0    | 4 |                                                                                                  |
| Sham+EV-D28  | 0    | 0    | 4 |                                                                                                  |
| MCAO+PBS-D28 | 7    | 1.15 | 4 |                                                                                                  |
| MCAO+EV-D28  | 4.5  | 0.58 | 4 |                                                                                                  |

**Supplementary Table S6.** Comparison of infarct volume (%) within MCAO and MCAO+EV treatment. Student t test results shown.

| Group    | Mean  | S.D. | N | P value | Comparison variables |
|----------|-------|------|---|---------|----------------------|
| Sham+PBS | 0     | 0    | 4 | NA      | NA                   |
| Sham+EV  | 0     | 0    | 4 | NA      | NA                   |
| MCAO+PBS | 57.08 | 4.48 | 4 | <0.0001 | MCAO+PBS VS Sham+EV  |
| MCAO+EV  | 50.76 | 2.91 | 4 | 0.0296  | MCAO+EV VS MCAO+PBS  |

**Supplementary Table S7.** VEGF positive cell numbers within MCAO and MCAO+EV treatment. Student t test results shown.

| Group    | Mean   | S.D.  | N | P value     | Comparison variables |
|----------|--------|-------|---|-------------|----------------------|
| Sham+PBS | 10.33  | 3.27  | 6 | NA          | NA                   |
| Sham+EV  | 13.33  | 7.04  | 6 | 0.350618753 | Sham+EV VS Sham+PBS  |
| MCAO+PBS | 112.20 | 9.5   | 6 | 3.85917E-11 | MCAO+PBS VS Sham+EV  |
| MCAO+EV  | 165.83 | 36.56 | 6 | 0.013846922 | MCAO+EV VS MCAO+PBS  |

**Supplementary Table S8.** CXCR4 positive cell numbers within MCAO and MCAO+EV treatment. Student t test results shown.

| Group    | Mean   | S.D.  | N | P value     | Comparison variables |
|----------|--------|-------|---|-------------|----------------------|
| Sham+PBS | 2.83   | 3.37  | 6 | NA          | NA                   |
| Sham+EV  | 1.88   | 2.57  | 6 | 0.64497438  | Sham+EV VS Sham+PBS  |
| MCAO+PBS | 107    | 16.37 | 6 | 1.68366E-09 | MCAO+PBS VS Sham+EV  |
| MCAO+EV  | 142.33 | 14.29 | 6 | 0.048026665 | MCAO+EV VS MCAO+PBS  |

**Supplementary Table S9.** SDF-1a positive cell numbers within MCAO and MCAO+EV treatment.  
Student t test results shown.

| Group    | Mean   | S.D.  | N | P value     | Comparison variables |
|----------|--------|-------|---|-------------|----------------------|
| Sham+PBS | 120.44 | 24.47 | 6 | NA          | NA                   |
| Sham+EV  | 110.67 | 8.19  | 6 | 0.272348184 | Sham+EV VS Sham+PBS  |
| MCAO+PBS | 299.5  | 63.94 | 6 | 2.55893E-07 | MCAO+PBS VS Sham+EV  |
| MCAO+EV  | 317.75 | 60.47 | 6 | 0.566852842 | MCAO+EV VS MCAO+PBS  |
